# Supplementary material for: Unlocking Foreign Language Enjoyment in GenAI-Assisted English Learning: A Q-Methodology Perspective from Chinese EFL Students
Source: Research Square preprint supplement (doi:10.21203/rs.3.rs-5824065/v1), 2025-01-30
Supplement: Supplementary file 1 [file 9b00f6cf3744b0fdf29e99ad.docx]

**Appendix Z-score and factor array of the statements**

| No. | Statement | Z-score | | | Factor Array | | |
| --- | --- | --- | --- | --- | --- | --- | --- |
| F1 | F2 | F3 | F1 | F2 | F3 |
| 1 | GenAI can respond to my learning needs promptly | 1.60 | 1.75 | 0.03 | 4 | 4 | 0 |
| 2 | GenAI provides personalized feedback based on my performance | 0.75 | 0.85 | -.28 | 2 | 3 | -1 |
| 3 | GenAI can understand my learning difficulties | -.72 | 0.86 | -.49 | -2 | 3 | -2 |
| 4 | GenAI's encouragement increases my learning motivation | -.23 | -.41 | 0.25 | -1 | -1 | 1 |
| 5 | GenAI's error correction doesn't make me feel pressured | 1.35 | 1.23 | 1.16 | 4 | 3 | 4 |
| 6 | GenAI can adjust learning content according to my pace | -.60 | 0.15 | -.84 | -1 | 1 | -2 |
| 7 | GenAI's responses are always encouraging | 1.61 | -.79 | -.13 | 5 | -3 | -1 |
| 8 | GenAI's guidance is clear and acceptable | 0.59 | -.14 | -.14 | 1 | 0 | -1 |
| 9 | GenAI acknowledges my progress | 0.10 | -.6 | 0.79 | 0 | -2 | 2 |
| 10 | GenAI creates a relaxed learning atmosphere | 0.81 | 0.03 | 1.17 | 2 | 0 | 4 |
| 11 | I can get help from classmates when using GenAI to learn | 0.23 | -2.04 | -.49 | 1 | -5 | -2 |
| 12 | I enjoy sharing GenAI learning experiences with classmates | 0.73 | -1.82 | 1.11 | 2 | -4 | 3 |
| 13 | It's fun to discuss GenAI usage methods with classmates | 0.29 | -.62 | 0.67 | 1 | -2 | 2 |
| 14 | I learn new GenAI usage methods from my classmates | 0.97 | -.23 | 1.18 | 3 | -1 | 4 |
| 15 | Using GenAI increases interaction among classmates | -.76 | -1.91 | 0.15 | -2 | -5 | 0 |
| 16 | I feel peer support in GenAI learning | -.18 | -1.79 | 0.09 | 0 | -4 | 0 |
| 17 | Learning with GenAI together with classmates is enjoyable | 0.32 | -1.17 | -.10 | 1 | -4 | 0 |
| 18 | GenAI provides topics for discussion with classmates | 0.16 | 0.07 | 0.27 | 0 | 0 | 1 |
| 19 | Classmates share GenAI usage tips with each other | 0.54 | 0.02 | 0.51 | 1 | 0 | 1 |
| 20 | GenAI promotes classroom communication | -.31 | -.11 | 0.61 | -1 | 0 | 2 |
| 21 | GenAI helps me make faster progress in English | -.01 | 0.15 | -1.09 | 0 | 1 | -3 |
| 22 | GenAI helps me overcome learning difficulties | 0.17 | 1.77 | -.31 | 0 | 5 | -1 |
| 23 | I can feel the learning effectiveness that GenAI brings | -.40 | 1.38 | 0.27 | -1 | 4 | 1 |
| 24 | GenAI makes me more confident in my English ability | -.64 | -.32 | -1.43 | -2 | -1 | -4 |
| 25 | I feel proud of being able to use GenAI proficiently for learning | 1.15 | 0.21 | -.59 | 3 | 1 | -2 |
| 26 | GenAI helps me achieve my learning goals | 1.47 | 1.72 | 0.25 | 4 | 4 | 1 |
| 27 | Using GenAI makes my learning more efficient | 1.67 | 2.14 | 0.25 | 5 | 5 | 0 |
| 28 | GenAI helps me better understand my language level | -.49 | 0.14 | -1.99 | -1 | 1 | -5 |
| 29 | I can see clear progress after using GenAI | -.69 | -.19 | -1.02 | -2 | -1 | -3 |
| 30 | GenAI helps me overcome my language learning anxiety | -.01 | -.64 | -2.02 | 0 | -3 | -5 |
| 31 | GenAI makes English learning more interesting | 0.75 | -.47 | -1.36 | 2 | -2 | -4 |
| 32 | I engage actively in learning interactions with GenAI | -.88 | -.03 | -.48 | -3 | 0 | -1 |
| 33 | GenAI deepens my interest in English learning | -1.09 | -.52 | -1.67 | -3 | -2 | -4 |
| 34 | I enjoy the process of learning with GenAI | -.91 | 0.36 | 0.95 | -3 | 2 | 3 |
| 35 | GenAI makes me look forward to English learning | -1.88 | -.69 | -1.28 | -5 | -3 | -3 |
| 36 | I get deeply absorbed in GenAI-assisted learning | -1.73 | -.34 | 0.14 | -4 | -1 | 0 |
| 37 | GenAI helps me focus more on learning | -2.12 | 0.44 | 0.84 | -5 | 2 | 2 |
| 38 | I enjoy trying different GenAI learning features | 1.13 | 0.57 | 2.36 | 3 | 2 | 5 |
| 39 | GenAI creates an immersive learning experience | -1.28 | 0.81 | 0.99 | -4 | 2 | 3 |
| 40 | GenAI enhances my learning motivation | -1.41 | 0.15 | 1.68 | -4 | 1 | 5 |
